# Supplementary material for: Design and solvothermal synthesis of luminescent copper(i)-pyrazolate coordination oligomer and polymer frameworks
Source: Royal Society of Chemistry journal article supplement (doi:10.1039/b601009a), 2006-01-01
Supplement: b601009a.pdf [file b601009a.pdf]

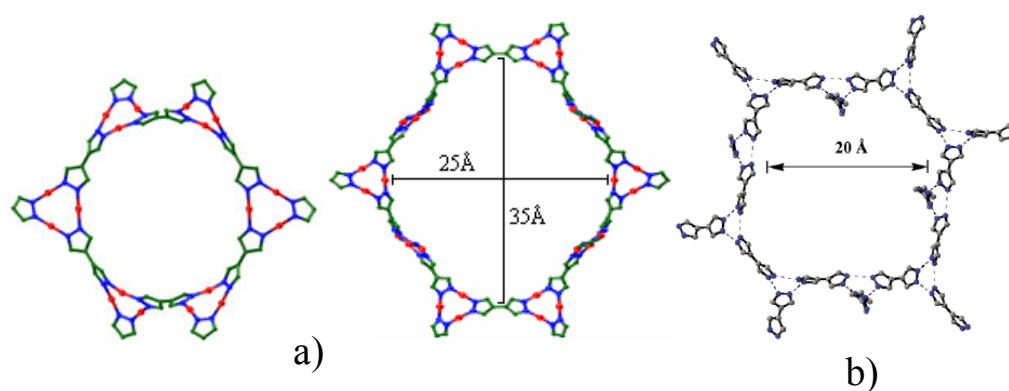

**Fig. S1** (a) Hexamer and decamer pores included in  $(\text{Cu}_3)_n$  network and (b) the H-bonded decameric pore in bipyrazole network reported in 2003.

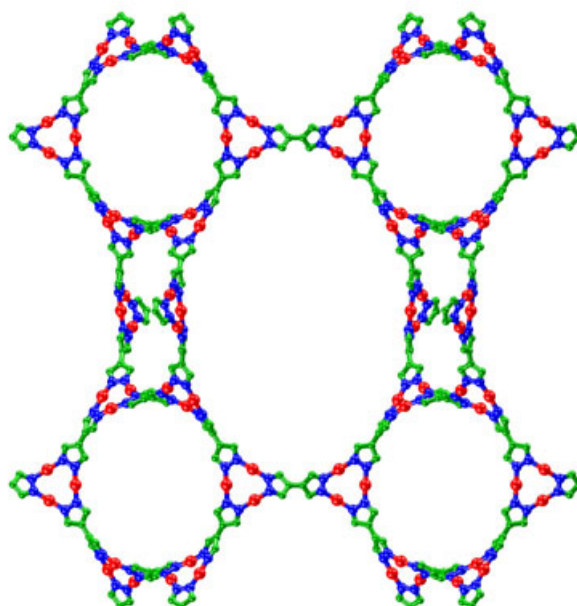

**Fig. S2** The organization of hexamer and decamer pores

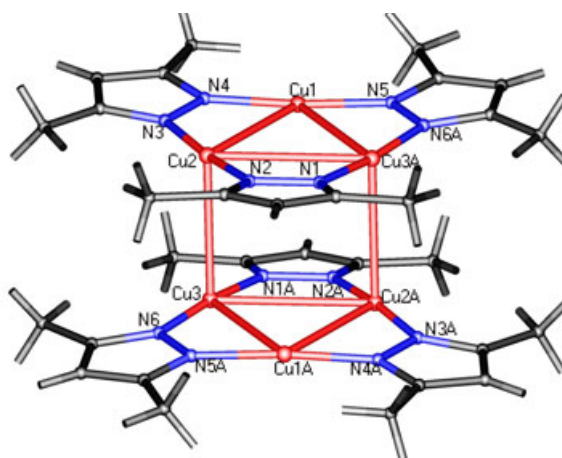

**Fig. S3** Dimeric staggered stacking pattern of **1**, highlighting the strong Cu-Cu interaction..

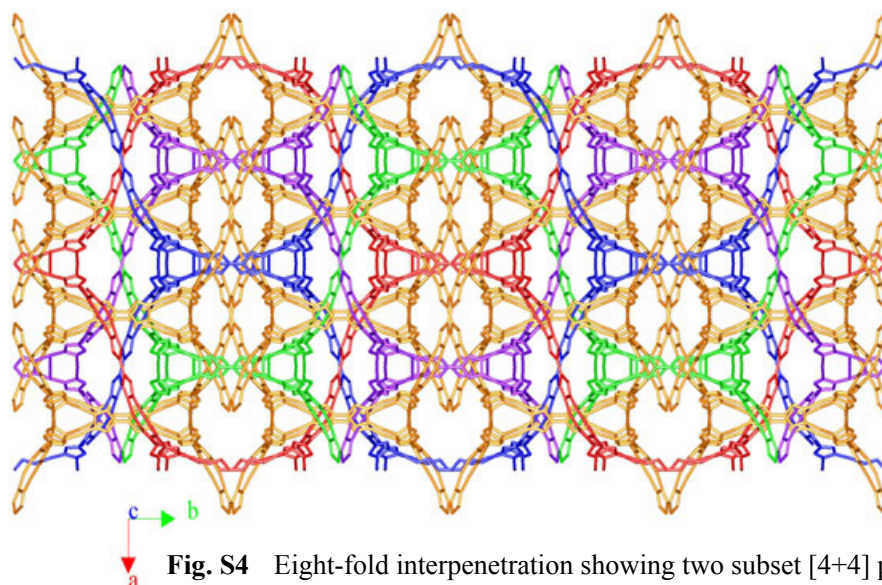

**Fig. S4** Eight-fold interpenetration showing two subset [4+4] pattern.

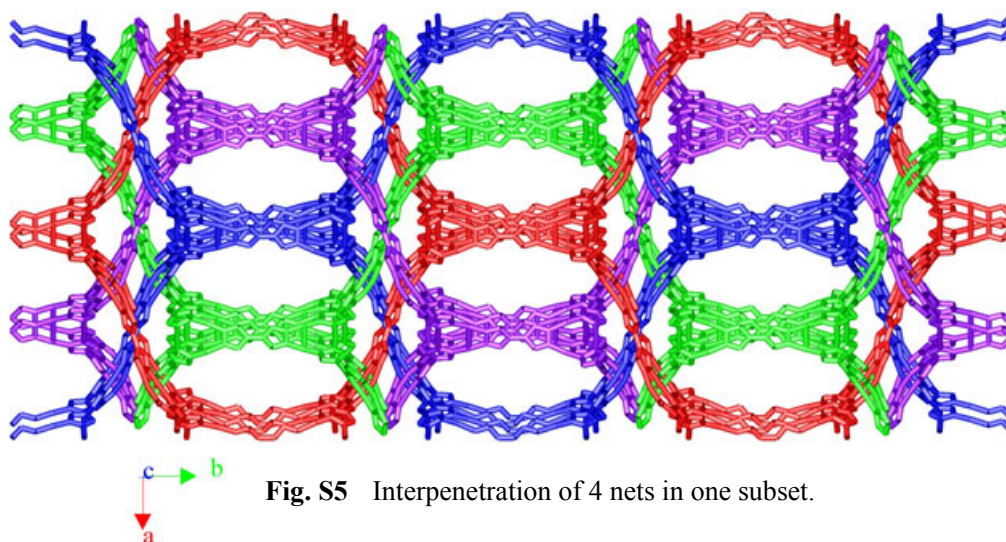

**Fig. S5** Interpenetration of 4 nets in one subset.

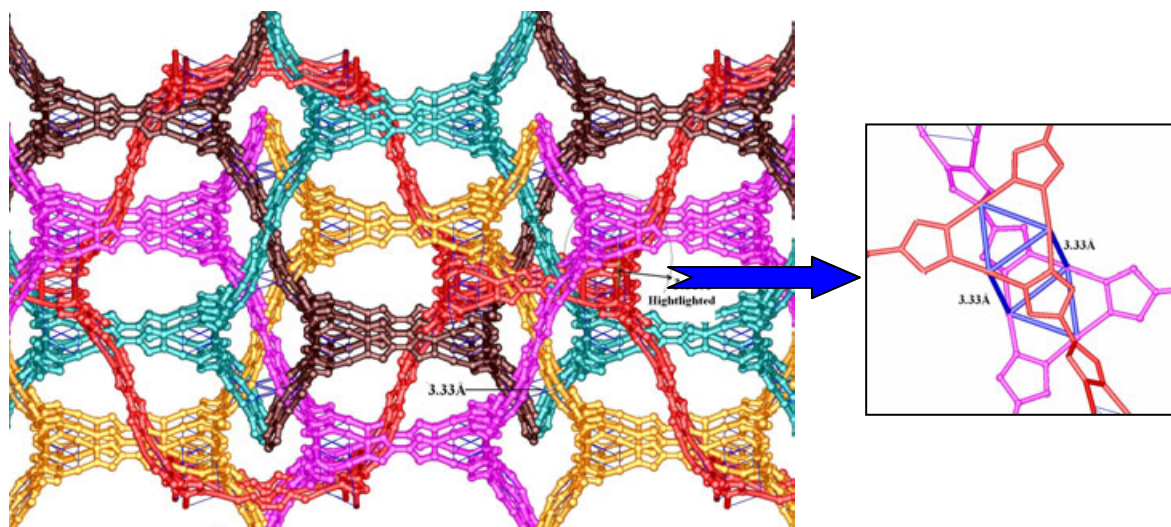

**Fig. S6** The interpenetrated networks showing intra- and inter-molecular Cu-Cu interaction colored in blue line and highlighting its stagger pattern.
